# Supplementary material for: Study protocol for a prospective, longitudinal cohort study investigating the medical and psychosocial outcomes of UK combat casualties from the Afghanistan war: the ADVANCE Study
Source: HighWire-hosted journal article supplement (doi:10.1136/bmjopen-2020-037850), 2020-10-01
Supplement: bmjopen-2020-037850supp001_data_supplement.pdf [file bmjopen-2020-037850supp001_data_supplement.pdf]

|                                                                                                                        | <b>BASELINE</b> | <b>FOLLOW UP<br/>APPOINTMENTS</b> |
|------------------------------------------------------------------------------------------------------------------------|-----------------|-----------------------------------|
| <b>CARDIOVASCULAR RISK/DISEASE</b>                                                                                     |                 |                                   |
| <i>BLOOD PRESSURE</i>                                                                                                  | X               | X                                 |
| - <i>DIASTOLIC</i>                                                                                                     |                 |                                   |
| - <i>SYSTOLIC</i>                                                                                                      |                 |                                   |
| <i>HEART RATE VARIABILITY</i>                                                                                          |                 | X                                 |
| - <i>PACED BREATHING</i>                                                                                               |                 |                                   |
| - <i>SPONTANEOUS BREATHING</i>                                                                                         |                 |                                   |
| <b>MAJOR ADVERSE CARDIOVASCULAR ENDPOINT (MACE)<br/>&amp; INDIVIDUAL COMPONENTS OF THE PRIMARY COMPOSITE CVD SCORE</b> | X               | X                                 |
| <b>QRISK</b>                                                                                                           | X               | X                                 |
| <b>SERUM SAMPLES</b>                                                                                                   | X               | X                                 |
| - <i>ALANINE AMINOTRANSFERASE</i>                                                                                      |                 |                                   |
| - <i>ALBUMIN</i>                                                                                                       |                 |                                   |
| - <i>ALKALINE PHOSPHATASE</i>                                                                                          |                 |                                   |
| - <i>BASOPHILS</i>                                                                                                     |                 |                                   |
| - <i>BILIRUBIN</i>                                                                                                     |                 |                                   |
| - <i>CHOLESTEROL</i>                                                                                                   |                 |                                   |
| - <i>EOSINOPHILS</i>                                                                                                   |                 |                                   |
| - <i>FASTING GLUCOSE</i>                                                                                               |                 |                                   |
| - <i>GAMMA-GLUTAMYL TRANSPEPTIDASE</i>                                                                                 |                 |                                   |
| - <i>HBA1C</i>                                                                                                         |                 |                                   |
| - <i>HEMOGLOBIN</i>                                                                                                    |                 |                                   |
| - <i>HIGH DENSITY LIPOPROTEINS</i>                                                                                     |                 |                                   |
| - <i>HIGH DENSITY LIPOPROTEIN/CHOLESTEROL RATIO</i>                                                                    |                 |                                   |
| - <i>HIGH SENSITIVITY C-REACTIVE PROTEIN</i>                                                                           |                 |                                   |
| - <i>LOW DENSITY LIPOPROTEINS</i>                                                                                      |                 |                                   |
| - <i>LYMPHOCYTES</i>                                                                                                   |                 |                                   |
| - <i>NEUTROPHILS</i>                                                                                                   |                 |                                   |
| - <i>NON-HIGH DENSITY LIPOPROTEIN CHOLESTEROL</i>                                                                      |                 |                                   |
| - <i>PLATELET</i>                                                                                                      |                 |                                   |
| - <i>TRIGLYCERIDES</i>                                                                                                 |                 |                                   |
| - <i>WHITE BLOOD CELLS</i>                                                                                             |                 |                                   |
| <b>SMOKING/TOBACCO USE</b>                                                                                             | X               | X                                 |

|                                                                 | BASELINE | FOLLOW UP APPOINTMENTS |
|-----------------------------------------------------------------|----------|------------------------|
| -CURRENT/PAST SMOKING HABITS                                    |          |                        |
| -NICOTINE REPLACEMENT THERAPY                                   |          |                        |
| <b>UREA &amp; ELECTROLYTES</b>                                  | X        | X                      |
| -CREATININE                                                     |          |                        |
| -ESTIMATED GLOMERULAR FILTRATION RATE                           |          |                        |
| -POTASSIUM                                                      |          |                        |
| -SODIUM                                                         |          |                        |
| -UREA                                                           |          |                        |
| <b>VICORDER ASSESSMENT</b>                                      | X        | X                      |
| -AUGMENTATION INDEX                                             |          |                        |
| -CENTRAL BLOOD PRESSURE                                         |          |                        |
| -PULSE WAVE ANALYSIS                                            |          |                        |
| -PULSE WAVE VELOCITY                                            |          |                        |
| WHATMAN CARD                                                    | X        |                        |
| <b>CARDIORESPIRATORY</b>                                        |          |                        |
| <b>SPIROMETRY</b>                                               | X        | X                      |
| -FORCED EXPIRATORY VOLUME                                       |          |                        |
| -FORCED VITAL CAPACITY                                          |          |                        |
| <b>MUSCULOSKELETAL DISEASE</b>                                  |          |                        |
| AMPUTEE MOBILITY PREDICTOR QUESTIONNAIRE*                       | X        | X                      |
| <b>AXIAL SPONDYLOARTHRITIS</b>                                  | X        | X                      |
| -ASSESSMENT OF SPONDYLOARTHRITIS INTERNATIONAL SOCIETY CRITERIA |          |                        |
| -FEATURES OF SPONDYLOARTHRITIS                                  |          |                        |
| BRIEF PAIN INVENTORY-SHORT FORM                                 |          | X                      |
| DISABILITY ARM, SHOULDER AND HAND QUESTIONNAIRE                 | X        | X                      |
| KNEE OSTEOARTHRITIS OUTCOMES SCORE                              | X        | X                      |
| MANCHESTER-OXFORD FOOT QUESTIONNAIRE                            |          | X                      |
| NEUROPATHIC PAIN: DN4                                           |          | X                      |
| NEUROPATHIC PAIN SYMPTOM INVENTORY                              |          | X                      |
| NON-ARTHRITIC HIP SCORE                                         | X        | X                      |
| OSWESTRY DISABILITY INDEX                                       | X        | X                      |

|                                                           | <b>BASELINE</b> | <b>FOLLOW UP<br/>APPOINTMENTS</b> |
|-----------------------------------------------------------|-----------------|-----------------------------------|
| <i>PAIN CATASTROPHISING SCALE</i>                         |                 | X                                 |
| <i>PHANTOM/STUMP PAIN*</i>                                | X               | X                                 |
| <i>PHYSICAL FUNCTION</i>                                  | X               | X                                 |
| <i>PROSTHETICS OUTCOMES*</i>                              | X               | X                                 |
| <i>RADIOLOGY</i>                                          | X               | X                                 |
| - DUAL EMISSION X-RAY ABSORPTIOMETRY                      |                 |                                   |
| -X-RAY                                                    |                 |                                   |
| <i>SIX-MINUTE WALK TEST</i>                               | X               | X                                 |
| -DISTANCE TRAVELLED                                       |                 |                                   |
| -PULSE VARIATION                                          |                 |                                   |
| <b>MENTAL HEALTH</b>                                      |                 |                                   |
| <i>ALCOHOL USE DISORDER IDENTIFICATION TOOLKIT</i>        | X               | X                                 |
| <i>DRUG USE DISORDER IDENTIFICATION TOOLKIT</i>           |                 | X                                 |
| <i>DEPLOYMENT-RELATED POST-TRAUMATIC GROWTH INVENTORY</i> | X               | X                                 |
| <i>POST-TRAUMATIC CHECK LIST-CIVILIAN</i>                 | X               |                                   |
| <i>POST-TRAUMATIC CHECK LIST V</i>                        |                 | X                                 |
| <i>PATIENT HEALTH QUESTIONNAIRE-9</i>                     | X               | X                                 |
| <i>GENERALISED ANXIETY DISORDER-7</i>                     | X               | X                                 |
| <b>OTHER</b>                                              |                 |                                   |
| <i>AUDIOMETRY</i>                                         | X               | X                                 |
| <i>BIOMETRIC ASSESSMENT</i>                               | X               | X                                 |
| -BMI                                                      |                 |                                   |
| -HEIGHT                                                   |                 |                                   |
| -WAIST/HIP RATIO                                          |                 |                                   |
| -WEIGHT                                                   |                 |                                   |
| <i>CHILDHOOD ADVERSE EVENTS</i>                           | X               | X                                 |
| <i>FAMILY HISTORY</i>                                     | X               | X                                 |
| -CANCER                                                   |                 |                                   |
| - CARDIOVASCULAR DISEASE                                  |                 |                                   |
| -MENTAL HEALTH                                            |                 |                                   |
| <i>HORMONE PROFILE</i>                                    |                 | X                                 |
| -TESTOSTERONE                                             |                 |                                   |
| -SEX HORMONE BINDING GLOBULIN                             |                 |                                   |

|                                                                                                            | BASELINE | FOLLOW UP<br>APPOINTMENTS |
|------------------------------------------------------------------------------------------------------------|----------|---------------------------|
| -FOLLICULAR STIMULATING HORMONE                                                                            |          |                           |
| -LUTEINIZING HORMONE                                                                                       |          |                           |
| INSOMNIA SEVERITY INDEX/PITTSBURGH SLEEP QUALITY INDEX                                                     | x        | x                         |
| INTERNATIONAL PHYSICAL ACTIVITY QUESTIONNAIRE                                                              | x        | x                         |
| OHIO-STATE TRAUMATIC BRAIN INJURY IDENTIFICATION QUESTIONNAIRE/ RIVERMEAD<br>POST-CONCUSSIVE QUESTIONNAIRE |          | x                         |
| MEDICAL HISTORY                                                                                            | x        | x                         |
| -CARDIOVASCULAR DISEASE                                                                                    |          |                           |
| -CARDIORESPIRATORY                                                                                         |          |                           |
| -GASTROINTESTINAL                                                                                          |          |                           |
| -GENITOURINARY                                                                                             |          |                           |
| -MENTAL HEALTH                                                                                             |          |                           |
| -MUSCULOSKELETAL                                                                                           |          |                           |
| -NEUROLOGICAL                                                                                              |          |                           |
| -OTHER                                                                                                     |          |                           |
| CURRENT MEDICATION USE                                                                                     | x        | x                         |
| MILITARY EXPERIENCES                                                                                       | x        | x                         |
| -DEPLOYMENT HISTORY                                                                                        |          |                           |
| -LENGTH OF SERVICE                                                                                         |          |                           |
| -MILITARY TRAINING                                                                                         |          |                           |
| -MILITARY PRIMARY ROLE                                                                                     |          |                           |
| -RANK                                                                                                      |          |                           |
| -VETERAN STATUS                                                                                            |          |                           |
| SOCIODEMOGRAPHIC                                                                                           | x        | x                         |
| -ETHNICITY                                                                                                 |          |                           |
| -RELATIONSHIP STATUS                                                                                       |          |                           |
| -EMPLOYMENT STATUS                                                                                         |          |                           |
| <b>TRAUMA DETAILS (EXPOSED GROUP ONLY)</b>                                                                 | x        |                           |
| -ABBREVIATED INJURY SCORE                                                                                  |          |                           |
| -BODY REGION                                                                                               |          |                           |
| -CAUSE OF INJURY                                                                                           |          |                           |
| -NEW INJURY SEVERITY SCORE                                                                                 |          |                           |
| * AMPUTEE SPECIFIC OUTCOMES                                                                                |          |                           |
